# Supplementary material for: Composite gel-polymer electrolyte for high-loading polysulfide cathodes
Source: Royal Society of Chemistry journal article supplement (doi:10.1039/d2ta01867e), 2022-01-01
Supplement: d2ta01867e1.pdf [file d2ta01867e1.pdf]

Supporting Information

Composite gel-polymer electrolyte for high-loading polysulfide cathodes

Li-Ling Chiu<sup>a</sup> and Sheng-Heng Chung<sup>a,b,\*</sup>

<sup>a</sup> Department of Materials Science and Engineering, National Cheng Kung University,  
No. 1, University Road, Tainan City 701

<sup>b</sup> Hierarchical Green-Energy Materials Research Center, National Cheng Kung  
University, No. 1, University Road, Tainan City 701

\*Sheng-Heng Chung: [SHChung@gs.ncku.edu.tw](mailto:SHChung@gs.ncku.edu.tw)

---

To whom correspondence should be addressed

## Supporting Figures

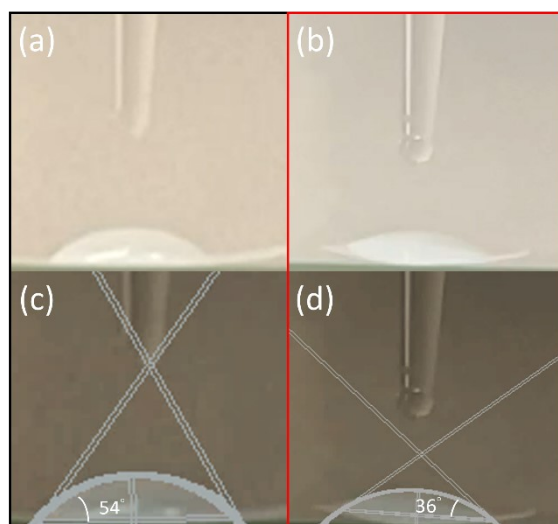

**Fig. S1.** Electrolyte affinity analysis: the contact angle of (a,c) polypropylene substrate and (b,d) PMMA-based GPE.

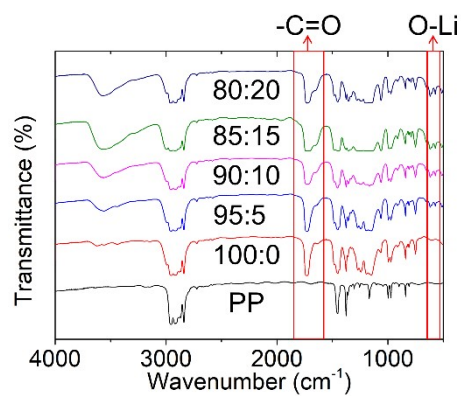

**Fig. S2.** Fourier-transform infrared (FTIR) spectroscopy of polymethyl methacrylate (PMMA)-based gel-polymer electrolyte (GPE) with different PMMA:LiTFSI ratios of 100:0, 95:5, 90:10, 85:15, and 80:20 wt% and the reference polymeric separator.

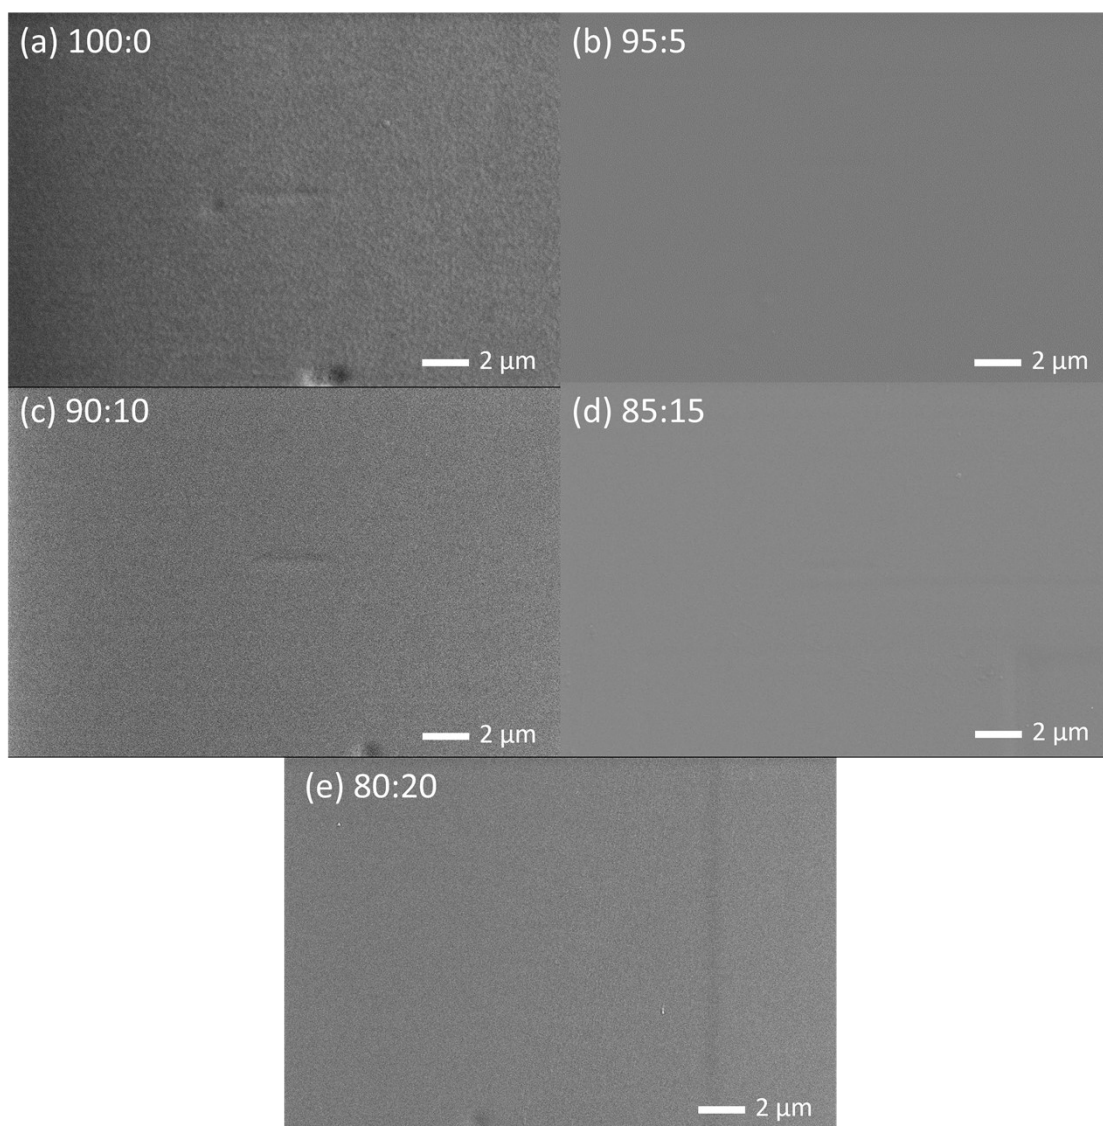

**Fig. S3.** Morphology analysis of PMMA-based GPE with different PMMA:LiTFSI ratios: (a) 100:0, (b) 95:5, (c) 90:10, (d) 85:15, and (e) 80:20 wt%.

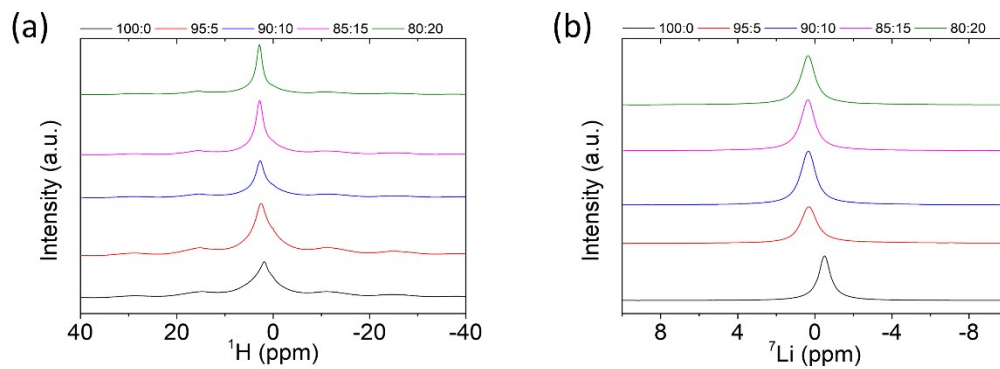

**Fig. S4.** Solid-state NMR of PMMA-based GPE with different PMMA:LiTFSI ratios of 100:0, 95:5, 90:10, 85:15, and 80:20 wt%: (a)  $^1\text{H}$  NMR and (b)  $^7\text{Li}$  NMR.

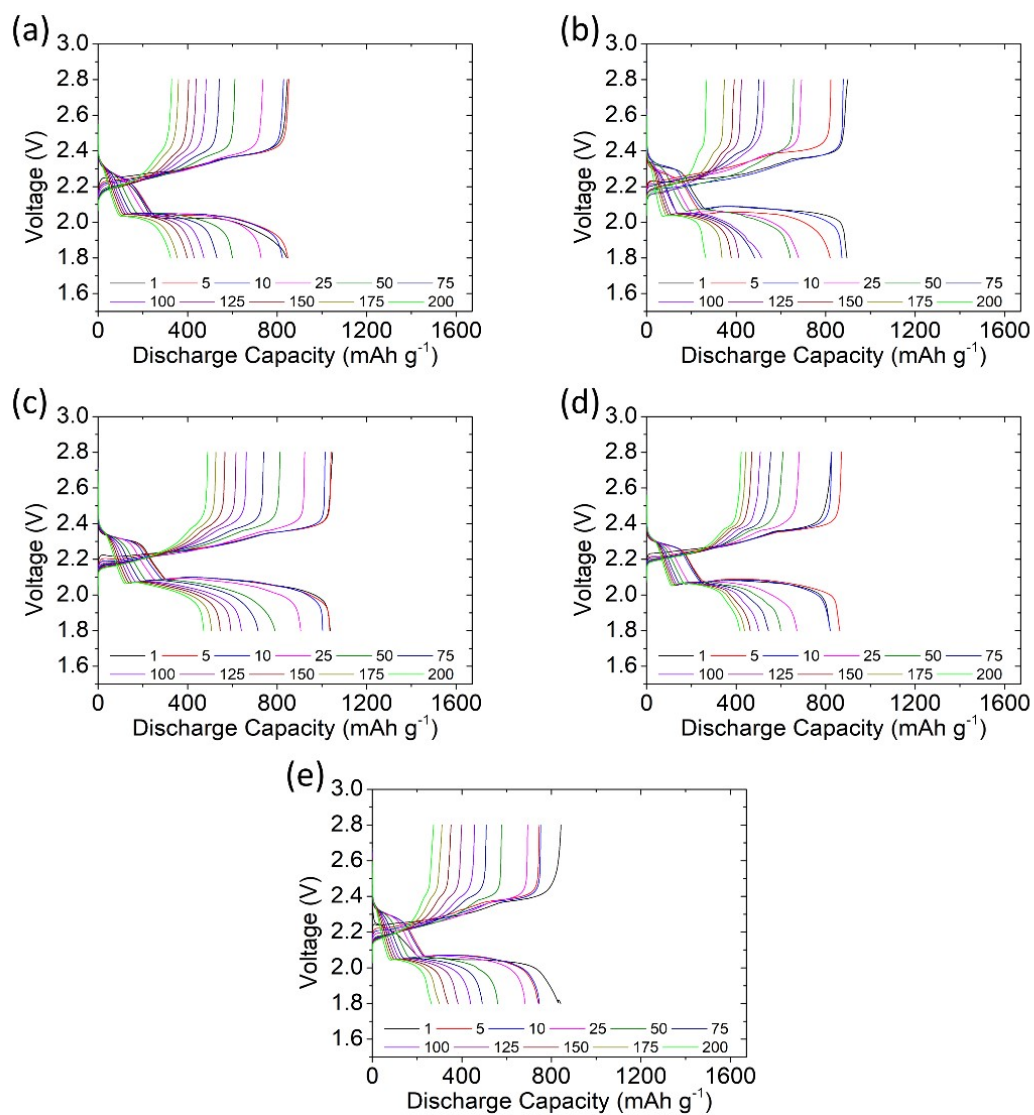

**Fig. S5.** Discharge/charge curves of high-sulfur-loading polysulfide cathodes with PMMA-based GPE with different PMMA:LiTFSI ratios: (a) 100:0, (b) 95:5, (c) 90:10, (d) 85:15, and (e) 80:20 wt%.

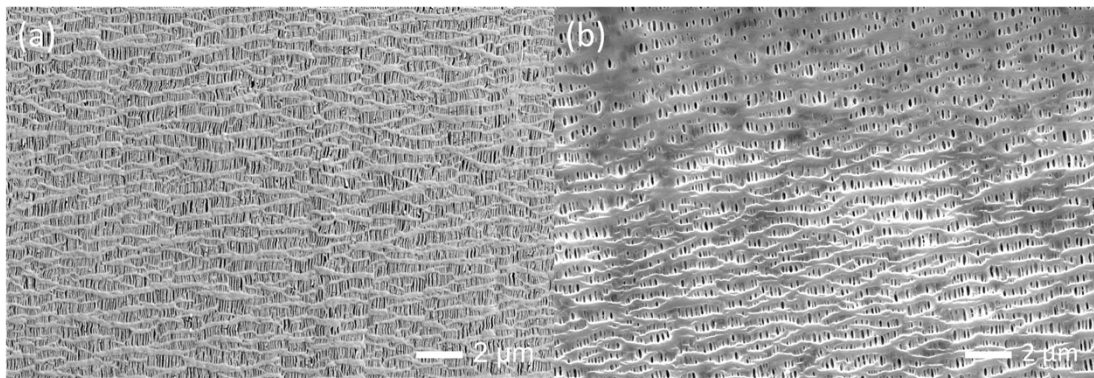

**Fig. S6.** Microstructural inspection from the anode side of PMMA-based GPE (a) before and (b) after cycling.

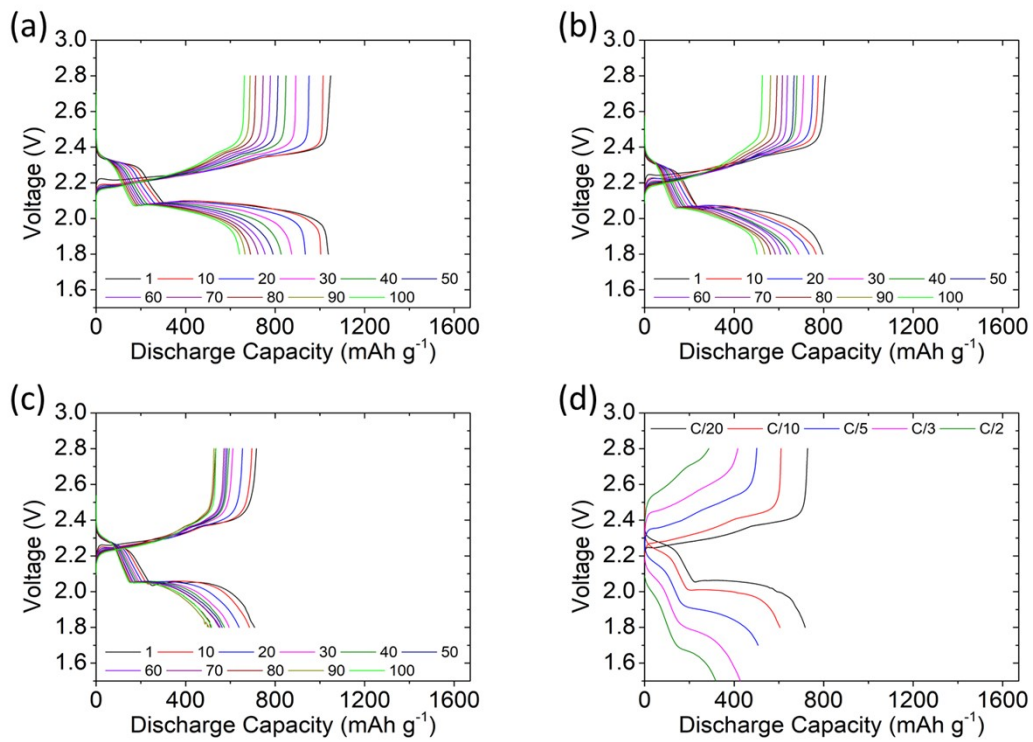

**Fig. S7.** Discharge/charge curves of high-sulfur-loading polysulfide cathodes with PMMA-based GPE (PMMA:LiTFSI = 90:10 wt%): (a) 4 mg cm<sup>-2</sup> sulfur, (b) 8 mg cm<sup>-2</sup> sulfur, and (c) 10 mg cm<sup>-2</sup> sulfur; and (d) rate capacity of sulfur loading of 10 mg cm<sup>-2</sup>.



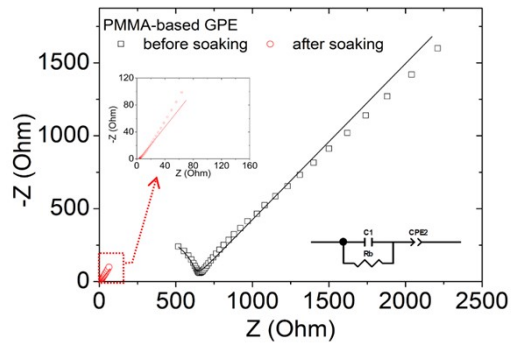

**Fig. S8.** Ionic conductivities of PMMA-based GPE before and after soaking electrolyte.

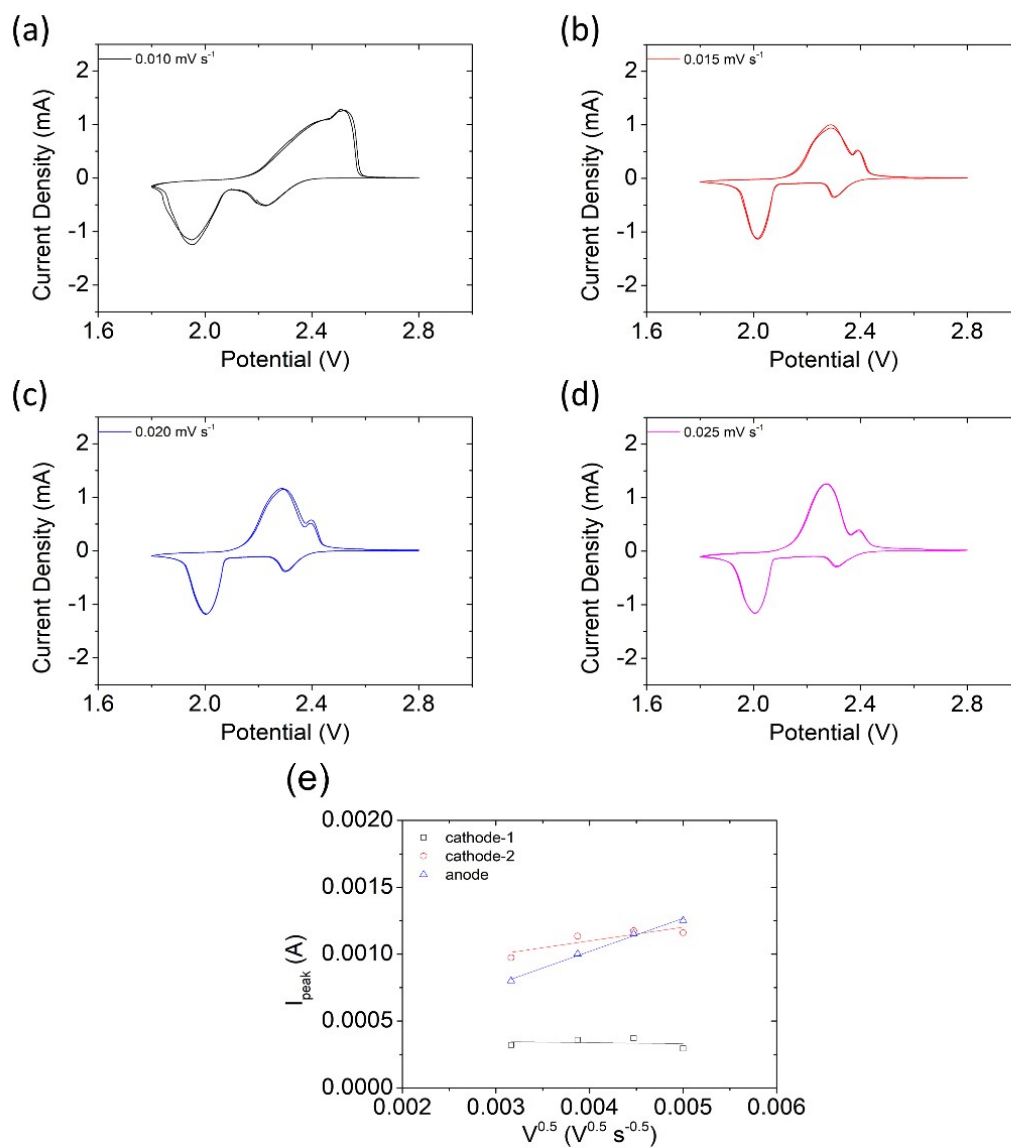

**Fig. S9.** Cyclic voltammetry (CV) analysis of high-sulfur-loading polysulfide cathodes with 4 mg cm<sup>-2</sup> sulfur and with PMMA-based GPE (PMMA:LiTFSI = 90:10 wt%) at different scan rates: (a) 0.010 mV s<sup>-1</sup>, (b) 0.015 mV s<sup>-1</sup>, (c) 0.020 mV s<sup>-1</sup>, and (d) 0.025 mV s<sup>-1</sup> and (e) lithium-ion diffusion coefficient analysis.

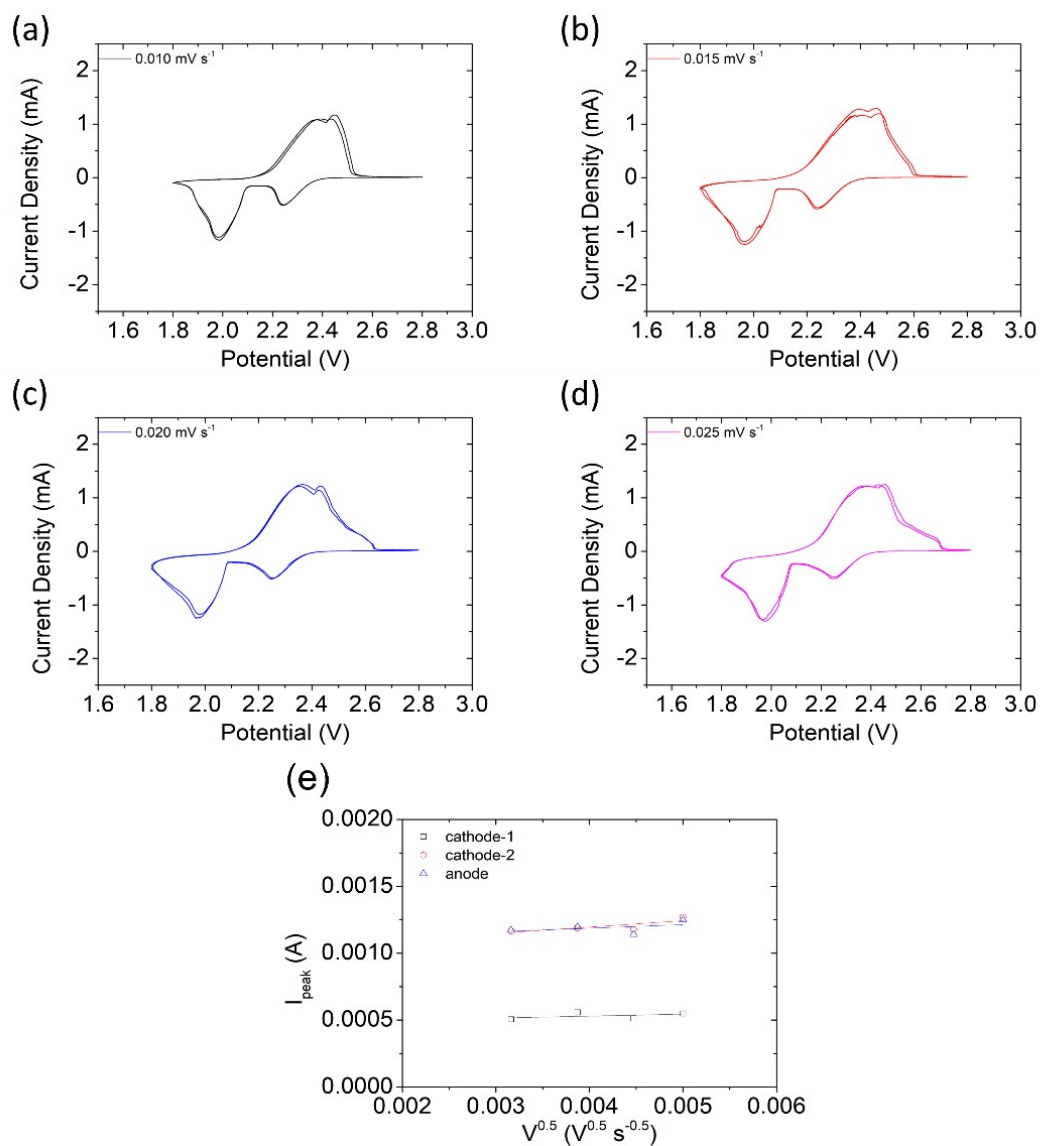

**Fig. S10.** CV analysis of high-sulfur-loading polysulfide cathodes with 8 mg cm<sup>-2</sup> sulfur and with PMMA-based GPE (PMMA:LiTFSI = 90:10 wt%) at different scan rates: (a) 0.010 mV s<sup>-1</sup>, (b) 0.015 mV s<sup>-1</sup>, (c) 0.020 mV s<sup>-1</sup>, and (d) 0.025 mV s<sup>-1</sup> and (e) lithium-ion diffusion coefficient analysis.

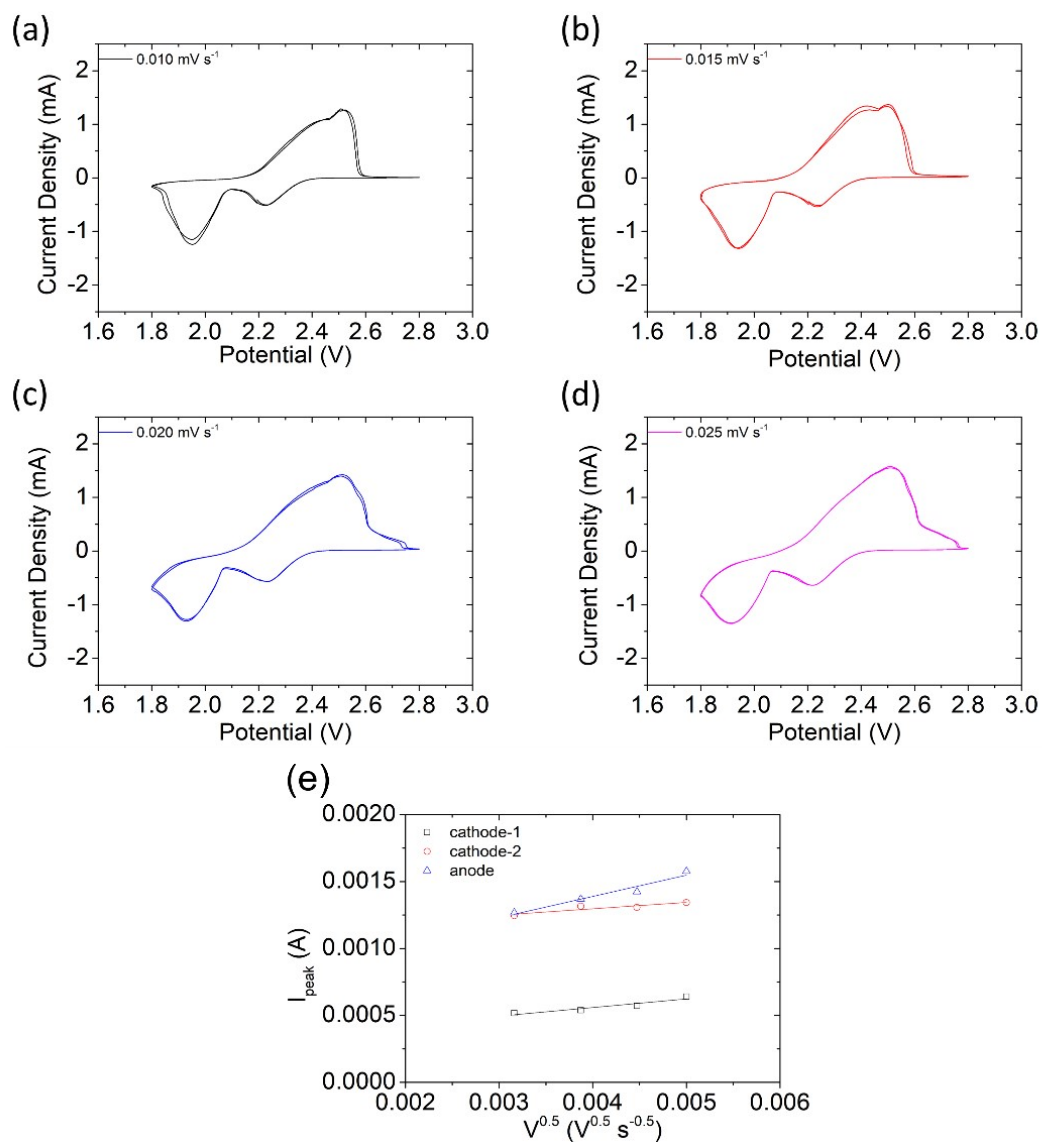

**Fig. S11.** CV analysis of high-sulfur-loading polysulfide cathodes with 10 mg cm<sup>-2</sup> sulfur and with PMMA-based GPE (PMMA:LiTFSI = 90:10 wt%) at different scan rates: (a) 0.010 mV s<sup>-1</sup>, (b) 0.015 mV s<sup>-1</sup>, (c) 0.020 mV s<sup>-1</sup>, and (d) 0.025 mV s<sup>-1</sup> and (e) lithium-ion diffusion coefficient analysis.

### Supporting Table

**Table S1.** Comparative of battery performance and electrochemical abilities with gel-polymer electrolyte in lithium-sulfur batteries.

| A    | B  | C    | D                           | E    | F     | G   | H     |
|------|----|------|-----------------------------|------|-------|-----|-------|
| 2016 | 60 | 1.8  | PAN/PMMA-electrospun/PETEA  | 1.43 | 475.2 | 3.0 | [S1]  |
| 2016 | 56 | 1.5  | PETEA                       | 0.79 | 296.6 | 1.7 | [S2]  |
| 2016 | 34 | 1    | PVDF/PMMA/PVDF              | 1.17 | 399   | 2.5 | [S3]  |
| 2017 | 82 | 5.2  | PVDF/PEO/ZrO <sub>2</sub>   | 4.57 | 720.8 | 9.6 | [S4]  |
| 2017 | 48 | 2    | PVDF-HFP/LATP               | 1.8  | 440.6 | 3.9 | [S5]  |
| 2018 | 70 | 1    | PDA-modified PVDF-based GPE | 1.22 | 850.8 | 2.6 | [S6]  |
| 2018 | 49 | 1.2  | poly(acrylic acid) (PAA)    | 0.67 | 275.4 | 1.4 | [S7]  |
| 2019 | 48 | 1    | PMMA/separator/AB           | 0.99 | 477.4 | 2.1 | [S8]  |
| 2019 | 49 | 0.55 | PP(Celgard 2400)/PMMA       | 0.61 | 539.1 | 1.3 | [S9]  |
| 2019 | 38 | 1    | PVDF/PMMA                   | 0.55 | 210.4 | 1.2 | [S10] |
| 2019 | 54 | 1    | PAN/PEO/LATP                | 0.90 | 487.9 | 1.9 | [S11] |
| 2019 | 48 | 1.2  | PVDF-HFP/PETT               | 0.72 | 288.5 | 1.5 | [S12] |
| 2020 | 48 | 2    | PETT-DA, PVDF-HFP           | 1.41 | 338.2 | 3.0 | [S13] |
| 2020 | 64 | 2    | PEGDA/LLZTO                 | 2.40 | 768.6 | 5.0 | [S14] |
| 2020 | 65 | 2    | PVDF-HFP/PSD                | 2.46 | 798.9 | 5.2 | [S15] |

|      |    |     |                |      |       |      |           |
|------|----|-----|----------------|------|-------|------|-----------|
| 2020 | 60 | 1.1 | PVDF-HFP       | 1.1  | 600   | 2.3  | [S16]     |
| 2020 | 70 | 2   | PVDF/PSPEG     | 1.89 | 660.1 | 4.0  | [S17]     |
| 2021 | 70 | 1   | PEI/PEGME      | 0.94 | 658   | 2.0  | [S18]     |
| 2021 | 76 | 6   | PEO/LiTFSI     | 3.82 | 484.1 | 8.0  | [S19]     |
| 2021 | 60 | 1.5 | PVA-CN or PDXL | 1.59 | 637.8 | 3.3  | [S20]     |
|      | 73 | 10  | PMMA/LiTFSI    | 7.10 | 509.8 | 15.1 | This work |

A: Year, B: sulfur content [wt%], C: sulfur loading [ $\text{mg cm}^{-2}$ ], D: polymer, E: areal capacity [ $\text{mA}\cdot\text{h cm}^{-2}$ ], F: gravimetric capacity [ $\text{mA}\cdot\text{h g}^{-1}$ ], G: energy density [ $\text{mW}\cdot\text{h cm}^{-2}$ ], H: references.

## Supporting References

- S1. M. Liu, H. R. Jiang, Y. X. Ren, D. Zhou, F. Y. Kang and T. S. Zhao, *Electrochim. Acta*, 2016, **213**, 871-878.
- S2. M. Liu, D. Zhou, Y.-B. He, Y. Fu, X. Qin, C. Miao, H. Du, B. Li, Q.-H. Yang, Z. Lin, T. S. Zhao and F. Kang, *Nano Energy*, 2016, **22**, 278-289.
- S3. W. Yang, W. Yang, J. Feng, Z. Ma and G. Shao, *Electrochim. Acta*, 2016, **210**, 71-78.
- S4. S. Gao, K. Wang, R. Wang, M. Jiang, J. Han, T. Gu, S. Cheng and K. Jiang, *J. Mater. Chem. A*, 2017, **5**, 17889-17895.
- S5. Y. Xia, X. Wang, X. Xia, R. Xu, S. Zhang, J. Wu, Y. Liang, C. Gu and J. Tu, *Chem. Eur. J.*, 2017, **23**, 15203-15209.
- S6. D.-D. Han, S. Liu, Y.-T. Liu, Z. Zhang, G.-R. Li and X.-P. Gao, *J. Mater. Chem. A*, 2018, **6**, 18627-18634.
- S7. S. Song, L. Shi, S. Lu, Y. Pang, Y. Wang, M. Zhu, D. Ding and S. Ding, *J. Membr. Sci.*, 2018, **563**, 277-283.
- S8. D. Yang, L. He, Y. Liu, W. Yan, S. Liang, Y. Zhu, L. Fu, Y. Chen and Y. Wu, *J. Mater. Chem. A*, 2019, **7**, 13679-13686.
- S9. C. Deng, Z. Wang, S. Wang, J. Yu, D. J. Martin, A. K. Nanjundan and Y. Yamauchi, *ACS Appl. Mater. Interfaces*, 2019, **11**, 541-549.
- S10. Y. Liu, D. Yang, W. Yan, Q. Huang, Y. Zhu, L. Fu and Y. Wu, *iScience*, 2019, **19**, 316-325.
- S11. X. Wang, X. Hao, Y. Xia, Y. Liang, X. Xia and J. Tu, *J. Membr. Sci.*, 2019, **582**, 37-47.
- S12. Y. Xia, Y. F. Liang, D. Xie, X. L. Wang, S. Z. Zhang, X. H. Xia, C. D. Gu and J. P. Tu, *Chem. Eng. J.*, 2019, **358**, 1047-1053.

- S13. X. Wang, X. Hao, D. Cai, S. Zhang, X. Xia and J. Tu, *Chem. Eng. J.*, 2020, **382**, 122714.
- S14. D. Shao, L. Yang, K. Luo, M. Chen, P. Zeng, H. Liu, L. Liu, B. Chang, Z. Luo and X. Wang, *Chem. Eng. J.*, 2020, **389**, 124300.
- S15. J.-H. Jiang, A.-B. Wang, W.-K. Wang, Z.-Q. Jin and L.-Z. Fan, *J. Energy Chem.*, 2020, **46**, 114-122.
- S16. J. Yu, S. Liu, G. Duan, H. Fang and H. Hou, *Compos. Commun.*, 2020, **19**, 239-245.
- S17. Y.-Q. Shen, F.-L. Zeng, X.-Y. Zhou, A.-b. Wang, W.-k. Wang, N.-Y. Yuan and J.-N. Ding, *J. Energy Chem.*, 2020, **48**, 267-276.
- S18. T. Zhang, J. Zhang, S. Yang, Y. Li, R. Dong, J. Yuan, Y. Liu, Z. Wu, Y. Song, Y. Zhong, W. Xiang, Y. Chen, B. Zhong and X. Guo, *ACS Appl. Mater. Interfaces*, 2021, **13**, 44497-44508.
- S19. L.-L. Chiu and S.-H. Chung, *Polymers*, 2021, **13**, 535.
- S20. Y.-J. Yang, R. Wang, J.-X. Xue, F.-Q. Liu, J. Yan, S.-X. Jia, T.-Q. Xiang, H. Huo, J.-J. Zhou and L. Li, *J. Mater. Chem. A*, 2021, **9**, 27390-27397.
